# Supplementary material for: Folic Acid Supplementation Promotes Hypomethylation in Both the Inflamed Colonic Mucosa and Colitis-Associated Dysplasia
Source: MDPI journal article supplement (doi:10.3390/cancers15112949), 2023-05-27
Supplement: s1 [file s1]

| Supplemental Table S1. Genes were significantly methylated between 8 mg FA vs. 0 mg FA treated epithelium |                        |                                        |                        |                        |                      |
|-----------------------------------------------------------------------------------------------------------|------------------------|----------------------------------------|------------------------|------------------------|----------------------|
| 411 genes, 347 Cp                                                                                         | 16                     | 344                                    | 133                    | 196 genes (264 CpGs)   |                      |
| <b>CpGs 8N vs 0N</b>                                                                                      | <b>RNA 8N Vs 0N</b>    | <b>Expressed 0N (sum reads &gt;10)</b> | <b>RNA 8P Vs 8N</b>    | <b>RNA 0P vs 0N</b>    | <b>CpGs 0P vs 0N</b> |
| T                                                                                                         | Yes(DESeq2)            | N                                      | Yes(CuffDiff)          | Yes(DESeq2)            | 0                    |
| Slc4a11                                                                                                   | Yes(DESeq2)            | Y                                      | Yes(CuffDiff & DESeq2) | Yes(CuffDiff & DESeq2) | 2                    |
| Epha2                                                                                                     | Yes(DESeq2)            | Y                                      | Yes(CuffDiff & DESeq2) | Yes(CuffDiff & DESeq2) | 1                    |
| Enc1                                                                                                      | Yes(DESeq2)            | Y                                      | Yes(CuffDiff & DESeq2) | Yes(CuffDiff & DESeq2) | 0                    |
| Rab11fip4                                                                                                 | Yes(DESeq2)            | Y                                      | Yes(CuffDiff & DESeq2) | Yes(CuffDiff & DESeq2) | 0                    |
| Atp11a                                                                                                    | Yes(DESeq2)            | Y                                      | Yes(CuffDiff & DESeq2) | Yes(CuffDiff & DESeq2) | 0                    |
| Zfp703                                                                                                    | Yes(DESeq2)            | Y                                      | No                     | Yes(CuffDiff & DESeq2) | 0                    |
| Rims4                                                                                                     | Yes(CuffDiff)          | Y                                      | Yes(DESeq2)            | Yes(CuffDiff & DESeq2) | 1                    |
| Lzts1                                                                                                     | Yes(CuffDiff)          | Y                                      | Yes(CuffDiff & DESeq2) | Yes(DESeq2)            | 0                    |
| Dusp4                                                                                                     | Yes(CuffDiff)          | Y                                      | Yes(CuffDiff & DESeq2) | Yes(CuffDiff & DESeq2) | 3                    |
| Spink4                                                                                                    | Yes(CuffDiff)          | Y                                      | Yes(CuffDiff & DESeq2) | No                     | 1                    |
| Tns4                                                                                                      | Yes(CuffDiff)          | Y                                      | Yes(CuffDiff & DESeq2) | No                     | 2                    |
| Fut9                                                                                                      | Yes(CuffDiff)          | Y                                      | No                     | Yes(CuffDiff & DESeq2) | 2                    |
| Neu1                                                                                                      | Yes(CuffDiff & DESeq2) | Y                                      | Yes(DESeq2)            | Yes(CuffDiff & DESeq2) | 2                    |
| Thbs1                                                                                                     | Yes(CuffDiff & DESeq2) | Y                                      | Yes(CuffDiff & DESeq2) | Yes(CuffDiff & DESeq2) | 2                    |
| Arntl                                                                                                     | No                     | Y                                      | Yes(DESeq2)            | No                     | 2                    |
| Accn1                                                                                                     | No                     | Y                                      | Yes(DESeq2)            | No                     | 0                    |
| Foxg1                                                                                                     | No                     | Y                                      | Yes(DESeq2)            | Yes(DESeq2)            | 0                    |
| Il1r2                                                                                                     | No                     | Y                                      | Yes(DESeq2)            | Yes(DESeq2)            | 0                    |
| Trim29                                                                                                    | No                     | Y                                      | Yes(DESeq2)            | Yes(DESeq2)            | 1                    |
| Gata4                                                                                                     | No                     | Y                                      | Yes(DESeq2)            | Yes(DESeq2)            | 0                    |
| Cdh4                                                                                                      | No                     | Y                                      | Yes(DESeq2)            | No                     | 1                    |
| Zbtb32                                                                                                    | No                     | Y                                      | Yes(DESeq2)            | No                     | 1                    |
| Tbx4                                                                                                      | No                     | Y                                      | Yes(DESeq2)            | Yes(DESeq2)            | 0                    |
| Crybb3                                                                                                    | No                     | Y                                      | Yes(DESeq2)            | No                     | 0                    |
| Ptch2                                                                                                     | No                     | Y                                      | Yes(DESeq2)            | Yes(DESeq2)            | 2                    |
| Mapk10                                                                                                    | No                     | Y                                      | Yes(DESeq2)            | Yes(DESeq2)            | 0                    |
| Syt2                                                                                                      | No                     | Y                                      | Yes(DESeq2)            | Yes(DESeq2)            | 0                    |
| Hrc                                                                                                       | No                     | Y                                      | Yes(DESeq2)            | No                     | 1                    |
| Lrp11                                                                                                     | No                     | Y                                      | Yes(DESeq2)            | Yes(DESeq2)            | 0                    |

|               |    |   |             |                        |   |
|---------------|----|---|-------------|------------------------|---|
| 2310050B05Rik | No | Y | Yes(DESeq2) | Yes(DESeq2)            | 1 |
| Foxl1         | No | Y | Yes(DESeq2) | Yes(DESeq2)            | 1 |
| Lmx1a         | No | Y | Yes(DESeq2) | Yes(DESeq2)            | 0 |
| Edn2          | No | Y | Yes(DESeq2) | Yes(DESeq2)            | 0 |
| Hkdc1         | No | Y | Yes(DESeq2) | Yes(DESeq2)            | 2 |
| Ccdc39        | No | Y | Yes(DESeq2) | Yes(DESeq2)            | 0 |
| Zfpm1         | No | Y | Yes(DESeq2) | Yes(DESeq2)            | 5 |
| Adrb1         | No | Y | Yes(DESeq2) | Yes(DESeq2)            | 0 |
| Zfp637        | No | Y | Yes(DESeq2) | Yes(DESeq2)            | 1 |
| Gpr146        | No | Y | Yes(DESeq2) | No                     | 0 |
| Chchd5        | No | Y | Yes(DESeq2) | No                     | 1 |
| Pdzd3         | No | Y | Yes(DESeq2) | Yes(DESeq2)            | 1 |
| Olfm1         | No | Y | Yes(DESeq2) | Yes(DESeq2)            | 1 |
| Gas8          | No | Y | Yes(DESeq2) | Yes(DESeq2)            | 0 |
| Usp2          | No | Y | Yes(DESeq2) | Yes(CuffDiff & DESeq2) | 0 |
| Fam108a       | No | Y | Yes(DESeq2) | No                     | 0 |
| Mon1a         | No | Y | Yes(DESeq2) | No                     | 0 |
| Cspg4         | No | Y | Yes(DESeq2) | Yes(DESeq2)            | 0 |
| Palm          | No | Y | Yes(DESeq2) | No                     | 0 |
| Phf16         | No | Y | Yes(DESeq2) | Yes(DESeq2)            | 1 |
| Nkx2-3        | No | Y | Yes(DESeq2) | No                     | 0 |
| Cntrob        | No | Y | Yes(DESeq2) | Yes(DESeq2)            | 2 |
| Dpep1         | No | Y | Yes(DESeq2) | Yes(DESeq2)            | 1 |
| Cygb          | No | Y | Yes(DESeq2) | No                     | 1 |
| Kctd5         | No | Y | Yes(DESeq2) | Yes(DESeq2)            | 0 |
| Sephs1        | No | Y | Yes(DESeq2) | Yes(DESeq2)            | 0 |
| Prkag1        | No | Y | Yes(DESeq2) | No                     | 0 |
| Camta1        | No | Y | Yes(DESeq2) | Yes(DESeq2)            | 2 |
| Fgd5          | No | Y | Yes(DESeq2) | Yes(DESeq2)            | 1 |
| Nfatc2        | No | Y | Yes(DESeq2) | Yes(DESeq2)            | 3 |
| Zfp395        | No | Y | Yes(DESeq2) | Yes(CuffDiff & DESeq2) | 0 |
| lqsec2        | No | Y | Yes(DESeq2) | Yes(CuffDiff & DESeq2) | 1 |
| Mst1r         | No | Y | Yes(DESeq2) | Yes(DESeq2)            | 0 |
| Cul4b         | No | Y | Yes(DESeq2) | No                     | 2 |
| Chmp1a        | No | Y | Yes(DESeq2) | No                     | 1 |

|          |    |   |             |                        |   |
|----------|----|---|-------------|------------------------|---|
| Tenc1    | No | Y | Yes(DESeq2) | Yes(CuffDiff & DESeq2) | 0 |
| Liph     | No | Y | Yes(DESeq2) | No                     | 2 |
| Atp6v1b2 | No | Y | Yes(DESeq2) | Yes(DESeq2)            | 0 |
| Irs2     | No | Y | Yes(DESeq2) | Yes(CuffDiff & DESeq2) | 0 |
| Trp53bp2 | No | Y | Yes(DESeq2) | Yes(DESeq2)            | 1 |
| Arhgef16 | No | Y | Yes(DESeq2) | No                     | 0 |
| Dip2a    | No | Y | Yes(DESeq2) | Yes(CuffDiff & DESeq2) | 0 |
| Vamp3    | No | Y | Yes(DESeq2) | Yes(DESeq2)            | 2 |
| Pcyt1a   | No | Y | Yes(DESeq2) | Yes(DESeq2)            | 1 |
| Zadh2    | No | Y | Yes(DESeq2) | Yes(CuffDiff & DESeq2) | 1 |
| Kank2    | No | Y | Yes(DESeq2) | Yes(CuffDiff & DESeq2) | 0 |
| Atp8a2   | No | Y | Yes(DESeq2) | Yes(DESeq2)            | 0 |
| Dock6    | No | Y | Yes(DESeq2) | Yes(DESeq2)            | 0 |
| Pecam1   | No | Y | Yes(DESeq2) | No                     | 1 |
| Ndrp1    | No | Y | Yes(DESeq2) | No                     | 0 |
| Crim1    | No | Y | Yes(DESeq2) | Yes(CuffDiff & DESeq2) | 0 |
| Tom1l2   | No | Y | Yes(DESeq2) | Yes(CuffDiff & DESeq2) | 0 |
| Rbms1    | No | Y | Yes(DESeq2) | Yes(DESeq2)            | 2 |
| Arhgap26 | No | Y | Yes(DESeq2) | Yes(CuffDiff & DESeq2) | 1 |
| L1cam    | No | Y | Yes(DESeq2) | Yes(DESeq2)            | 0 |
| H2afy    | No | Y | Yes(DESeq2) | Yes(DESeq2)            | 1 |
| Csrp1    | No | Y | Yes(DESeq2) | No                     | 0 |
| Golph3   | No | Y | Yes(DESeq2) | Yes(DESeq2)            | 1 |
| Tmed2    | No | Y | Yes(DESeq2) | No                     | 0 |
| Eps8l3   | No | Y | Yes(DESeq2) | Yes(CuffDiff & DESeq2) | 0 |
| Gapvd1   | No | Y | Yes(DESeq2) | No                     | 0 |
| Sec16a   | No | Y | Yes(DESeq2) | No                     | 0 |
| Sec63    | No | Y | Yes(DESeq2) | Yes(DESeq2)            | 0 |
| Nr3c1    | No | Y | Yes(DESeq2) | Yes(CuffDiff & DESeq2) | 1 |
| Ppp1r15b | No | Y | Yes(DESeq2) | Yes(DESeq2)            | 1 |
| Cyt5a    | No | Y | Yes(DESeq2) | No                     | 1 |
| Krt8     | No | Y | Yes(DESeq2) | No                     | 1 |
| Btbd17   | No | N | Yes(DESeq2) | Yes(DESeq2)            | 0 |
| Wnt7b    | No | N | Yes(DESeq2) | Yes(DESeq2)            | 0 |
| Rhpn1    | No | N | Yes(DESeq2) | No                     | 1 |

|               |    |   |                        |                        |   |
|---------------|----|---|------------------------|------------------------|---|
| 9830001H06Rik | No | Y | Yes(CuffDiff)          | Yes(DESeq2)            | 0 |
| Ccna2         | No | Y | Yes(CuffDiff)          | Yes(DESeq2)            | 0 |
| Itpripl2      | No | Y | Yes(CuffDiff)          | Yes(CuffDiff & DESeq2) | 1 |
| Robo2         | No | Y | Yes(CuffDiff)          | No                     | 0 |
| Fst           | No | Y | Yes(CuffDiff & DESeq2) | Yes(CuffDiff & DESeq2) | 0 |
| Grhl3         | No | Y | Yes(CuffDiff & DESeq2) | Yes(DESeq2)            | 2 |
| Mycn          | No | Y | Yes(CuffDiff & DESeq2) | No                     | 0 |
| Slc26a10      | No | Y | Yes(CuffDiff & DESeq2) | Yes(CuffDiff)          | 0 |
| Phlda3        | No | Y | Yes(CuffDiff & DESeq2) | Yes(CuffDiff & DESeq2) | 0 |
| Rasl11b       | No | Y | Yes(CuffDiff & DESeq2) | Yes(CuffDiff & DESeq2) | 0 |
| B3gnt6        | No | Y | Yes(CuffDiff & DESeq2) | Yes(CuffDiff)          | 3 |
| Grasp         | No | Y | Yes(CuffDiff & DESeq2) | Yes(DESeq2)            | 1 |
| Cd79b         | No | Y | Yes(CuffDiff & DESeq2) | No                     | 1 |
| Ppfia3        | No | Y | Yes(CuffDiff & DESeq2) | Yes(CuffDiff & DESeq2) | 0 |
| Zdhhc14       | No | Y | Yes(CuffDiff & DESeq2) | Yes(CuffDiff & DESeq2) | 1 |
| Chst11        | No | Y | Yes(CuffDiff & DESeq2) | Yes(CuffDiff & DESeq2) | 1 |
| Sntg2         | No | Y | Yes(CuffDiff & DESeq2) | Yes(CuffDiff & DESeq2) | 0 |
| Cadm1         | No | Y | Yes(CuffDiff & DESeq2) | Yes(CuffDiff & DESeq2) | 1 |
| Galm          | No | Y | Yes(CuffDiff & DESeq2) | Yes(CuffDiff & DESeq2) | 0 |
| Epb4.1l4a     | No | Y | Yes(CuffDiff & DESeq2) | No                     | 0 |
| Slc41a1       | No | Y | Yes(CuffDiff & DESeq2) | Yes(CuffDiff & DESeq2) | 0 |
| Pogk          | No | Y | Yes(CuffDiff & DESeq2) | Yes(DESeq2)            | 2 |
| Arhgap24      | No | Y | Yes(CuffDiff & DESeq2) | Yes(CuffDiff)          | 0 |
| Irf4          | No | Y | Yes(CuffDiff & DESeq2) | Yes(DESeq2)            | 0 |
| Lamc2         | No | Y | Yes(CuffDiff & DESeq2) | Yes(CuffDiff & DESeq2) | 1 |
| Mta1          | No | Y | Yes(CuffDiff & DESeq2) | Yes(DESeq2)            | 1 |
| Znrf3         | No | Y | Yes(CuffDiff & DESeq2) | Yes(CuffDiff & DESeq2) | 1 |
| Bcl9          | No | Y | Yes(CuffDiff & DESeq2) | Yes(DESeq2)            | 0 |
| Notch1        | No | Y | Yes(CuffDiff & DESeq2) | Yes(DESeq2)            | 0 |
| Pck1          | No | Y | Yes(CuffDiff & DESeq2) | Yes(CuffDiff & DESeq2) | 1 |
| Cdx1          | No | Y | Yes(CuffDiff & DESeq2) | Yes(CuffDiff & DESeq2) | 0 |
| Map4k4        | No | Y | Yes(CuffDiff & DESeq2) | Yes(CuffDiff & DESeq2) | 2 |
| Slc44a4       | No | Y | Yes(CuffDiff & DESeq2) | Yes(CuffDiff & DESeq2) | 2 |
| Dgkh          | No | Y | Yes(CuffDiff & DESeq2) | Yes(CuffDiff & DESeq2) | 0 |
| Irx4          | No | N | Yes(CuffDiff & DESeq2) | Yes(CuffDiff & DESeq2) | 0 |

|               |    |   |    |                        |   |
|---------------|----|---|----|------------------------|---|
| Adam18        | No | Y | No | No                     | 0 |
| Scn4a         | No | Y | No | No                     | 1 |
| Frmpd3        | No | Y | No | No                     | 0 |
| Loxhd1        | No | Y | No | No                     | 1 |
| Osta          | No | Y | No | No                     | 1 |
| Dazl          | No | Y | No | No                     | 1 |
| Nupl1         | No | Y | No | No                     | 0 |
| Gpr123        | No | Y | No | No                     | 0 |
| Tmem17        | No | Y | No | No                     | 0 |
| Gm10941       | No | Y | No | No                     | 0 |
| Ggn           | No | Y | No | No                     | 0 |
| Rxrg          | No | Y | No | No                     | 0 |
| Slit1         | No | Y | No | No                     | 2 |
| Dlgap3        | No | Y | No | No                     | 0 |
| Col4a4        | No | Y | No | No                     | 0 |
| Gm5424        | No | Y | No | No                     | 0 |
| Proc          | No | Y | No | No                     | 0 |
| Slc13a3       | No | Y | No | No                     | 0 |
| Tspan10       | No | Y | No | No                     | 0 |
| Fam19a5       | No | Y | No | No                     | 0 |
| T2            | No | Y | No | No                     | 0 |
| Dbc1          | No | Y | No | No                     | 0 |
| Lrp1b         | No | Y | No | No                     | 0 |
| E130012A19Rik | No | Y | No | Yes(CuffDiff & DESeq2) | 0 |
| Ccr7          | No | Y | No | No                     | 2 |
| Rasl10b       | No | Y | No | No                     | 0 |
| Kcnh1         | No | Y | No | No                     | 0 |
| Fmod          | No | Y | No | No                     | 1 |
| Slc2a6        | No | Y | No | No                     | 0 |
| Krt80         | No | Y | No | No                     | 0 |
| Atcay         | No | Y | No | No                     | 1 |
| Hipk4         | No | Y | No | No                     | 1 |
| 2210417A02Rik | No | Y | No | No                     | 1 |
| St8sia5       | No | Y | No | No                     | 1 |
| Srcin1        | No | Y | No | No                     | 0 |

|               |    |   |    |             |   |
|---------------|----|---|----|-------------|---|
| Eomes         | No | Y | No | No          | 0 |
| Ldhal6b       | No | Y | No | No          | 1 |
| 4833422F24Rik | No | Y | No | No          | 0 |
| Slc26a6       | No | Y | No | No          | 0 |
| Tusc1         | No | Y | No | No          | 0 |
| Slc36a2       | No | Y | No | No          | 1 |
| Celsr3        | No | Y | No | No          | 0 |
| BC002163      | No | Y | No | No          | 1 |
| Fam65c        | No | Y | No | No          | 0 |
| Eda           | No | Y | No | No          | 0 |
| Vmn2r99       | No | Y | No | No          | 1 |
| 4930590J08Rik | No | Y | No | No          | 1 |
| Abcg8         | No | Y | No | No          | 0 |
| Bend7         | No | Y | No | Yes(DESeq2) | 0 |
| 1200009I06Rik | No | Y | No | No          | 0 |
| Slc41a3       | No | Y | No | No          | 0 |
| Col11a2       | No | Y | No | Yes(DESeq2) | 0 |
| Meox1         | No | Y | No | No          | 1 |
| Obscn         | No | Y | No | No          | 3 |
| Ido1          | No | Y | No | No          | 0 |
| Prx           | No | Y | No | No          | 1 |
| Gm885         | No | Y | No | No          | 1 |
| Ikzf4         | No | Y | No | No          | 0 |
| Pde6g         | No | Y | No | No          | 0 |
| Pfn2          | No | Y | No | Yes(DESeq2) | 1 |
| Fosb          | No | Y | No | No          | 1 |
| Prdm16        | No | Y | No | No          | 1 |
| Cacna1i       | No | Y | No | No          | 0 |
| Slc46a3       | No | Y | No | No          | 2 |
| Pdzd4         | No | Y | No | No          | 0 |
| Evx2          | No | Y | No | No          | 1 |
| Egr3          | No | Y | No | No          | 1 |
| Asf1b         | No | Y | No | No          | 0 |
| Iqsec3        | No | Y | No | No          | 0 |
| Pou3f2        | No | Y | No | No          | 0 |

|               |    |   |    |                        |   |
|---------------|----|---|----|------------------------|---|
| Fam83d        | No | Y | No | No                     | 1 |
| Fstl3         | No | Y | No | No                     | 0 |
| Rps19bp1      | No | Y | No | No                     | 0 |
| Jdp2          | No | Y | No | No                     | 1 |
| 8430419L09Rik | No | Y | No | No                     | 1 |
| Oas3          | No | Y | No | No                     | 0 |
| Mtus2         | No | Y | No | Yes(DESeq2)            | 2 |
| Neil2         | No | Y | No | No                     | 1 |
| Suox          | No | Y | No | No                     | 0 |
| Rilpl1        | No | Y | No | No                     | 0 |
| Efemp2        | No | Y | No | Yes(DESeq2)            | 0 |
| Mus81         | No | Y | No | No                     | 0 |
| Alg1          | No | Y | No | No                     | 1 |
| Kynu          | No | Y | No | No                     | 0 |
| 2610301B20Rik | No | Y | No | No                     | 0 |
| Dtd1          | No | Y | No | No                     | 2 |
| Ror2          | No | Y | No | No                     | 1 |
| Hic1          | No | Y | No | No                     | 1 |
| Prdx4         | No | Y | No | No                     | 0 |
| Thap1         | No | Y | No | No                     | 0 |
| Ube2g2        | No | Y | No | No                     | 0 |
| Miat          | No | Y | No | No                     | 1 |
| Zbtb45        | No | Y | No | No                     | 1 |
| Adck1         | No | Y | No | No                     | 2 |
| Cxcr7         | No | Y | No | Yes(DESeq2)            | 2 |
| Plxna4        | No | Y | No | No                     | 1 |
| Cdk18         | No | Y | No | Yes(CuffDiff & DESeq2) | 0 |
| Trib2         | No | Y | No | No                     | 0 |
| Katnal1       | No | Y | No | No                     | 1 |
| Myo1g         | No | Y | No | No                     | 0 |
| Nufip1        | No | Y | No | Yes(DESeq2)            | 1 |
| Grid1         | No | Y | No | No                     | 0 |
| 2410131K14Rik | No | Y | No | No                     | 0 |
| Anpep         | No | Y | No | No                     | 1 |
| Vmn2r112      | No | Y | No | No                     | 1 |

|               |    |   |    |                        |   |
|---------------|----|---|----|------------------------|---|
| Ncdn          | No | Y | No | No                     | 0 |
| Rin3          | No | Y | No | No                     | 1 |
| Rhbdf2        | No | Y | No | Yes(CuffDiff & DESeq2) | 1 |
| Unc13d        | No | Y | No | No                     | 0 |
| Arhgap23      | No | Y | No | Yes(CuffDiff & DESeq2) | 0 |
| Ap1s1         | No | Y | No | No                     | 0 |
| Tmem18        | No | Y | No | No                     | 0 |
| Runx3         | No | Y | No | No                     | 0 |
| Exosc9        | No | Y | No | Yes(DESeq2)            | 0 |
| Lrsam1        | No | Y | No | No                     | 2 |
| Fam109a       | No | Y | No | Yes(DESeq2)            | 0 |
| Dtnbp1        | No | Y | No | No                     | 0 |
| Tada1         | No | Y | No | No                     | 2 |
| 1500002O20Rik | No | Y | No | No                     | 2 |
| Slc29a3       | No | Y | No | Yes(DESeq2)            | 1 |
| Dhx35         | No | Y | No | Yes(DESeq2)            | 1 |
| Plbd2         | No | Y | No | No                     | 0 |
| Zbtb34        | No | Y | No | No                     | 1 |
| Pofut2        | No | Y | No | No                     | 0 |
| Fam86         | No | Y | No | No                     | 1 |
| Med24         | No | Y | No | No                     | 0 |
| Rxrb          | No | Y | No | No                     | 0 |
| Scfd2         | No | Y | No | Yes(DESeq2)            | 0 |
| Spryd3        | No | Y | No | No                     | 0 |
| Stx8          | No | Y | No | No                     | 1 |
| 1110059E24Rik | No | Y | No | No                     | 0 |
| Cep152        | No | Y | No | No                     | 0 |
| 4933431E20Rik | No | Y | No | Yes(CuffDiff)          | 0 |
| Cd37          | No | Y | No | No                     | 1 |
| Mcts1         | No | Y | No | No                     | 2 |
| Kremen1       | No | Y | No | Yes(DESeq2)            | 1 |
| Pja1          | No | Y | No | No                     | 1 |
| Pomp          | No | Y | No | Yes(DESeq2)            | 2 |
| Fbxl18        | No | Y | No | No                     | 0 |
| Lphn1         | No | Y | No | No                     | 0 |



|         |    |   |    |                        |   |
|---------|----|---|----|------------------------|---|
| Fam55d  | No | Y | No | No                     | 1 |
| Sptlc1  | No | Y | No | No                     | 1 |
| Satb1   | No | Y | No | Yes(CuffDiff)          | 1 |
| Srebf1  | No | Y | No | Yes(CuffDiff & DESeq2) | 0 |
| Rgs3    | No | Y | No | No                     | 0 |
| Wbp2    | No | Y | No | No                     | 0 |
| Flt1    | No | Y | No | No                     | 2 |
| Pdzd2   | No | Y | No | No                     | 1 |
| Pla2r1  | No | Y | No | No                     | 0 |
| Psmd3   | No | Y | No | Yes(CuffDiff & DESeq2) | 2 |
| Hn1l    | No | Y | No | No                     | 1 |
| Syf2    | No | Y | No | No                     | 0 |
| Fbrsl1  | No | Y | No | No                     | 1 |
| Idh2    | No | Y | No | No                     | 1 |
| Zbtb43  | No | Y | No | Yes(DESeq2)            | 1 |
| Bcl9l   | No | Y | No | Yes(DESeq2)            | 0 |
| Zfp710  | No | Y | No | No                     | 3 |
| Fam129b | No | Y | No | Yes(DESeq2)            | 2 |
| Itgb6   | No | Y | No | No                     | 2 |
| Cep164  | No | Y | No | No                     | 0 |
| Trps1   | No | Y | No | No                     | 0 |
| Anxa8   | No | Y | No | No                     | 0 |
| Psmd7   | No | Y | No | Yes(DESeq2)            | 0 |
| Aldh1l1 | No | Y | No | No                     | 0 |
| Scml4   | No | Y | No | No                     | 0 |
| Mapkap1 | No | Y | No | Yes(DESeq2)            | 0 |
| Poldip3 | No | Y | No | No                     | 1 |
| Osbp13  | No | Y | No | No                     | 2 |
| Ophn1   | No | Y | No | No                     | 0 |
| Bcr     | No | Y | No | No                     | 1 |
| Slc2a1  | No | Y | No | No                     | 0 |
| Fbn1    | No | Y | No | No                     | 0 |
| Tsc1    | No | Y | No | Yes(DESeq2)            | 1 |
| Akt1    | No | Y | No | Yes(DESeq2)            | 0 |
| Tbc1d5  | No | Y | No | No                     | 0 |

|               |    |   |    |                        |   |
|---------------|----|---|----|------------------------|---|
| Tsc22d2       | No | Y | No | No                     | 1 |
| Mapk8ip3      | No | Y | No | No                     | 1 |
| Capn5         | No | Y | No | No                     | 3 |
| Rcor3         | No | Y | No | Yes(DESeq2)            | 0 |
| Fech          | No | Y | No | No                     | 1 |
| Ano6          | No | Y | No | No                     | 1 |
| Rgnef         | No | Y | No | No                     | 1 |
| Rp2h          | No | Y | No | No                     | 1 |
| Nars          | No | Y | No | Yes(DESeq2)            | 1 |
| Ppp1r9b       | No | Y | No | Yes(DESeq2)            | 0 |
| Tshz1         | No | Y | No | Yes(CuffDiff & DESeq2) | 1 |
| 4933407C03Rik | No | Y | No | No                     | 1 |
| Nptn          | No | Y | No | No                     | 2 |
| Lamc1         | No | Y | No | Yes(DESeq2)            | 1 |
| Rnu12         | No | Y | No | No                     | 1 |
| Cic           | No | Y | No | No                     | 0 |
| Gcn1l1        | No | Y | No | No                     | 2 |
| Col6a2        | No | Y | No | No                     | 1 |
| Wbp7          | No | Y | No | No                     | 1 |
| Pcnt          | No | Y | No | No                     | 0 |
| Ahctf1        | No | Y | No | No                     | 2 |
| Lcor          | No | Y | No | No                     | 2 |
| Wac           | No | Y | No | No                     | 0 |
| Med13l        | No | Y | No | No                     | 2 |
| Mfsd4         | No | Y | No | No                     | 0 |
| Foxn3         | No | Y | No | No                     | 2 |
| Tsc22d1       | No | Y | No | No                     | 1 |
| Anapc1        | No | Y | No | No                     | 1 |
| Pbx1          | No | Y | No | No                     | 1 |
| Yipf6         | No | Y | No | No                     | 0 |
| Txnrd1        | No | Y | No | Yes(DESeq2)            | 1 |
| Elf3          | No | Y | No | No                     | 1 |
| Cdc42bpa      | No | Y | No | Yes(CuffDiff & DESeq2) | 2 |
| Tnrc18        | No | Y | No | No                     | 0 |
| Lass4         | No | Y | No | Yes(CuffDiff)          | 0 |

|               |    |   |    |             |   |
|---------------|----|---|----|-------------|---|
| Ttc14         | No | Y | No | No          | 0 |
| Fndc3a        | No | Y | No | Yes(DESeq2) | 1 |
| Rplp0         | No | Y | No | No          | 2 |
| Mll2          | No | Y | No | No          | 0 |
| Pebp4         | No | N | No | No          | 1 |
| Fgf16         | No | N | No | No          | 0 |
| Mir139        | No | N | No | No          | 1 |
| Il25          | No | N | No | No          | 1 |
| Tmem8c        | No | N | No | No          | 0 |
| Actrt2        | No | N | No | No          | 1 |
| Mir719        | No | N | No | No          | 0 |
| Gk2           | No | N | No | No          | 0 |
| Mir346        | No | N | No | No          | 0 |
| Mir760        | No | N | No | No          | 1 |
| Samd7         | No | N | No | No          | 2 |
| Adm2          | No | N | No | No          | 0 |
| Fgf8          | No | N | No | No          | 1 |
| Sox3          | No | N | No | No          | 0 |
| Mir383        | No | N | No | No          | 0 |
| 2200002J24Rik | No | N | No | No          | 0 |
| Olfm4         | No | N | No | Yes(DESeq2) | 1 |
| Gm11202       | No | N | No | No          | 0 |
| Cyp2c29       | No | N | No | No          | 0 |
| Fbxo16        | No | N | No | No          | 0 |
| Cyp2c66       | No | N | No | No          | 0 |
| Fam178b       | No | N | No | No          | 0 |
| C130026L21Rik | No | N | No | No          | 1 |
| Cacng1        | No | N | No | No          | 2 |
| Fam163b       | No | N | No | No          | 2 |
| Ifna9         | No | N | No | No          | 0 |
| Wbscr28       | No | N | No | No          | 0 |
| Cmtm5         | No | N | No | No          | 1 |
| 4930571K23Rik | No | N | No | No          | 1 |
| Lhx4          | No | N | No | No          | 2 |
| Tekt4         | No | N | No | No          | 1 |

|               |    |   |    |    |   |
|---------------|----|---|----|----|---|
| 1700073E17Rik | No | N | No | No | 1 |
| LOC16697      | No | N | No | No | 0 |
| Lrriq4        | No | N | No | No | 2 |
| Nkx6-2        | No | N | No | No | 0 |
| Gucy2e        | No | N | No | No | 2 |
| Prrxl1        | No | N | No | No | 1 |
| Vgf           | No | N | No | No | 0 |
| Spaca3        | No | N | No | No | 0 |
| Mir691        | No | N | No | No | 0 |
| Gm6484        | No | N | No | No | 0 |
| B3gat1        | No | N | No | No | 0 |
| Tmem28        | No | N | No | No | 1 |
| D030018L15Rik | No | N | No | No | 1 |
| Tnfsf4        | No | N | No | No | 1 |
| Gas2l2        | No | N | No | No | 0 |
| Nmur2         | No | N | No | No | 0 |
| A530053G22Rik | No | N | No | No | 1 |
| Vmn2r98       | No | N | No | No | 1 |
| Sds           | No | N | No | No | 0 |
| Alppl2        | No | N | No | No | 0 |
| Egr4          | No | N | No | No | 0 |
| 1700096J18Rik | No | N | No | No | 0 |
| Oas1e         | No | N | No | No | 0 |
| Sgcz          | No | N | No | No | 0 |
| Vmn1r27       | No | N | No | No | 3 |
| 1700026L06Rik | No | N | No | No | 1 |
| Slc24a4       | No | N | No | No | 1 |
| Cyp3a11       | No | N | No | No | 0 |
| Cdh23         | No | N | No | No | 0 |
| Kcne1         | No | N | No | No | 2 |
| Antxrl        | No | N | No | No | 1 |
